# Supplementary material for: The Risk of T2DM in College Women: The Predictive Power of Financial versus Residential Status in a Cross-Sectional Pilot Study in Turkey
Source: MDPI journal article supplement (doi:10.3390/bs12090309), 2022-08-26
Supplement: s1 [file s1]

## Supplemental materials

**Table S1.** Energy and Nutrient Intake of Students According to Income (living with their family) (kcal/day and g/day).

|                                | Income Level      |        |           |                      |       |           |                    |       |           |              |        |          |        |
|--------------------------------|-------------------|--------|-----------|----------------------|-------|-----------|--------------------|-------|-----------|--------------|--------|----------|--------|
|                                | Low Income (n=20) |        |           | Middle Income (n=10) |       |           | High Income (n=10) |       |           | Total (n=40) |        |          | p      |
| Amount of Energy and Nutrients | X ± SD            | Med    | L-U       | X ± SD               | Med   | L-U       | X ± SD             | Med   | L-U       | X ± SD       | Med    | L-U      |        |
| Energy (kcal)                  | 1364.5±164.6      | 1372.5 | 1057-1594 | 1287.1±295           | 1286  | 820-2206  | 1184.3±172.5       | 1183  | 922-1578  | 1289.8±232.6 | 1280.5 | 820-2206 | 0.078  |
| Protein (g)                    | 47.9±16.5         | 45     | 28-110    | 54.7±17.9            | 52.8  | 24-97     | 55.8±13.3          | 50.7  | 40-91     | 52.5±16.5    | 50.2   | 24-110   | 0.186  |
| Protein (%)                    | 14.0±4            | 14     | 8-29      | 17.1±3.9             | 16    | 12-27     | 19.2±2.7           | 19    | 15-24     | 16.5±4.2     | 16     | 8-29     | 0.002* |
| Fat (g)                        | 53.2±9.6          | 55.6   | 37-71     | 46.4±14.9            | 47.3  | 22-86     | 39.5±8.7           | 38.5  | 25-59     | 47.7±12.8    | 46.2   | 22-86    | 0.003* |
| Fat (%)                        | 34.5±3.7          | 36     | 29-41     | 31.9±4.3             | 33    | 20-36     | 29.3±3             | 30    | 23-33     | 31.8±4.3     | 32     | 20-41    | 0.002* |
| Carbohydrate (g)               | 168.6 ±23         | 178.4  | 114-196   | 162.7 ±31.2          | 153.7 | 124-265   | 146.6 ±17.3        | 149   | 105-171   | 160.8 ±26.5  | 159.2  | 105-265  | 0.050* |
| Carbohydrate (%)               | 51.4±6.3          | 51     | 30-58     | 51.9±5.2             | 51    | 43-62     | 51.7±4.5           | 51    | 44-60     | 51.7±5.4     | 51     | 30-62    | 2.862  |
| Dietary Fiber (g)              | 14.8±4.8          | 15.5   | 7-23      | 15.5±4.5             | 15    | 6-24      | 14.0±3.8           | 13.3  | 11-26     | 14.9±4.4     | 14.1   | 6-26     | 1.188  |
| PUFA (g)                       | 17.4±32.4         | 10.2   | 5-161     | 8.8±3.9              | 8.9   | 2-18      | 8.1±4.9            | 7.7   | 3-22      | 11.7±20.1    | 8.8    | 2-161    | 0.426  |
| Cholesterol (mg)               | 177.7±104.4       | 163.8  | 32-377    | 196.9±100            | 208.8 | 39-391    | 184.4±93.2         | 185.1 | 50-318    | 186.7±98.7   | 188.1  | 32-391   | 2.448  |
| Vitamin A (µg)                 | 1451.7±1590.1     | 1046.3 | 309-649   | 920.8±566.6          | 929.6 | 0-1903    | 807.1±460.7        | 679   | 141-1614  | 1087±1072    | 913.5  | 0-6499   | 0.990  |
| Carotene (mg)                  | 3.6±3.1           | 2.7    | 1-13      | 2.7±1.8              | 2.3   | 0-6       | 2.2 ±1.6           | 1.6   | 0-5       | 2.9 ±2.5     | 2.3    | 0-13     | 1.194  |
| Vitamin E (mg)                 | 10.3±4.7          | 9      | 3-23      | 9.5±4.3              | 9.6   | 2-19      | 8.2±5.1            | 7.4   | 3-23      | 9.4±4.6      | 8.9    | 2-23     | 0.657  |
| Vitamin B1 (mg)                | 0.5±0.2           | 0.5    | 0-1       | 0.6±0.2              | 0.5   | 0-1       | 0.6±0.2            | 0.5   | 0-1       | 0.6±0.2      | 0.5    | 0-1      | 1.422  |
| Vitamin B2 (mg)                | 0.8±0.3           | 0.8    | 0-2       | 0.9±0.3              | 1     | 0-1       | 0.9±0.3            | 0.8   | 1-2       | 0.9±0.3      | 0.8    | 0-2      | 0.843  |
| Vitamin B6 (mg)                | 0.8±0.3           | 0.8    | 0-1       | 0.9±0.3              | 0.8   | 1-2       | 0.8±0.3            | 0.7   | 1-1       | 0.8±0.3      | 0.8    | 0-2      | 2.310  |
| Tot. Folic acid (µg)           | 161.8±47.5        | 151.3  | 86-234    | 185.8±58.8           | 187   | 99-298    | 183.1±48.2         | 173   | 124-306   | 176.4±52.6   | 173.3  | 86-306   | 1.140  |
| Vitamin C (mg)                 | 69.7±53           | 51.6   | 0-171     | 80.6±47              | 76.5  | 1-178     | 58.8±34.5          | 47.5  | 14-122    | 71.2±46.7    | 56.7   | 0-178    | 0.885  |
| Sodium (mg)                    | 2543.6±896.9      | 2350.5 | 491-3816  | 2999±1001            | 3060  | 1329-5878 | 2784±691           | 2688  | 1154-3795 | 2778.5±902.1 | 2891   | 491-5878 | 1.302  |
| Potassium (mg)                 | 1507.5±583.1      | 1300   | 518-2610  | 1633.6±597.8         | 1660  | 658-2958  | 1398±465           | 1444  | 735-2507  | 1528.5±560.8 | 1462   | 518-2958 | 1.500  |
| Calcium (mg)                   | 491.8±240.2       | 504.1  | 122-990   | 541.1±192.7          | 536   | 117-982   | 469.9±267.8        | 437   | 119-1066  | 505.2±228.6  | 504    | 117-1066 | 1.005  |
| Magnesium (mg)                 | 164.2±51          | 163.8  | 70-257    | 169.9±45             | 176   | 91-270    | 169.8±64.1         | 140   | 99-308    | 167.8±51.6   | 162    | 70-308   | 2.601  |
| Phosphorus (mg)                | 707.3±206.2       | 724    | 412-1185  | 836.2±199.9          | 829   | 389-1251  | 755.9±232.7        | 716   | 472-1392  | 768.8±214.7  | 752    | 389-1392 | 0.138  |
| Iron (mg)                      | 7.1±1.9           | 6.9    | 3-11      | 7.75±2.6             | 7.8   | 0-12      | 7.7±1.4            | 7.7   | 6-12      | 7.5±2.1      | 7.4    | 0-12     | 1.026  |
| Zinc (mg)                      | 5.8±1.7           | 5.9    | 2-9       | 7.7±2.7              | 7.7   | 3-14      | 7.4±2.2            | 7.2   | 4-11      | 6.9±2.4      | 6.7    | 2-14     | 0.084  |

-p values are calculated with Kruskal Wallis H-Test; p values are calculated independently from the daily energy intake. P values presented here are adjusted after post hoc Bonferroni correction. \* p <0.05.

**Table S2. Energy and Nutrient Intake of Students According to Income**

(living in dormitory) (kcal/day and g/day).

|                                | Income Level      |        |           |                      |        |          |                    |       |           |              |        |          |        |
|--------------------------------|-------------------|--------|-----------|----------------------|--------|----------|--------------------|-------|-----------|--------------|--------|----------|--------|
|                                | Low Income (n=20) |        |           | Middle Income (n=10) |        |          | High Income (n=10) |       |           | Total (n=40) |        |          | p      |
| Amount of Energy and Nutrients | X ± SD            | Med    | L-U       | X ± SD               | Med    | L-U      | X ± SD             | Med   | L-U       | X ± SD       | Med    | L-U      |        |
| Energy (kcal)                  | 1324.5±321        | 1360   | 810-1861  | 1210.5±293.6         | 1249.5 | 542-1656 | 1247.4±287.7       | 1248  | 801-1703  | 1276.7±302.9 | 1280.5 | 542-1861 | 2.013  |
| Protein (g)                    | 45.4±16           | 43.5   | 23-76     | 54.8±11.2            | 57.2   | 27-67    | 67.9±14.8          | 63.1  | 49-95     | 53.4±17      | 56.5   | 23-95    | 0.015* |
| Protein (%)                    | 13.65±3           | 13     | 10-22     | 18.6±1.5             | 19.0   | 17-21    | 22.6±5.3           | 21    | 18-34     | 17.1±5.1     | 17     | 10-34    | 0.002* |
| Fat (g)                        | 62±22.2           | 63.9   | 15-105    | 54.1±19.2            | 52.9   | 10-82    | 51.1±24.1          | 48.5  | 12-85     | 57.3±22      | 58.9   | 10-105   | 1.278  |
| Fat (%)                        | 40.1±9.1          | 41.5   | 14-52     | 38.2±8.9             | 40.5   | 16-46    | 34.3±11.1          | 37.5  | 13-46     | 38.2±9.6     | 40.5   | 13-52    | 0.486  |
| Carbohydrate (g)               | 148.5±32.4        | 158.7  | 60-189    | 241.6±376.7          | 119.3  | 85-1311  | 128.5±17.1         | 122.1 | 108-153   | 166.8±187.9  | 139.8  | 60-1311  | 0.174  |
| Carbohydrate (%)               | 46.2±9.6          | 44     | 33-76     | 43.1±8.6             | 39.5   | 35-64    | 43±7.7             | 42.5  | 30-58     | 44.7±8.8     | 43     | 30-76    | 0.873  |
| Dietary Fiber (g)              | 14.1±5.8          | 13     | 2-24      | 11.4±3.1             | 10.2   | 7-17     | 13.3±4.3           | 13.3  | 7-20      | 13.3±4.9     | 12.4   | 2-24     | 0.846  |
| PUFA (g)                       | 12.8±6            | 13.4   | 3-23      | 11.6±4.1             | 12.1   | 2-16     | 11.3±6.4           | 12.2  | 2-25      | 12.2±5.6     | 12.8   | 2-25     | 2.118  |
| Cholesterol (mg)               | 378.5±124.5       | 376.8  | 120-828   | 300.3±122.4          | 305.4  | 87-502   | 291.7±125.1        | 248.7 | 157-551   | 337.3±128    | 352.5  | 87-828   | 0.204  |
| Vitamin A (µg)                 | 838.7±399.9       | 855.3  | 110-1602  | 667.6±272.8          | 601.2  | 312-1023 | 854.9±452.5        | 966.4 | 3-1536    | 800±385.2    | 836.7  | 3-1602   | 1.116  |
| Carotene (mg)                  | 2.1±1.7           | 1.5    | 0-6       | 1.3±0.8              | 1.2    | 0-3      | 3.9±4.7            | 3.2   | 1-17      | 2.3±2.7      | 1.7    | 0-17     | 0.489  |
| Vitamin E (mg)                 | 12.1±5.8          | 12.3   | 3-25      | 10.1±4.3             | 10.9   | 3-16     | 9.8±4.6            | 10.6  | 3-17      | 11.1±5.2     | 11.5   | 3-25     | 1.383  |
| Vitamin B1 (mg)                | 0.5±0.2           | 0.5    | 0-1       | 0.5±0.1              | 0.5    | 0-1      | 0.6±0.2            | 0.5   | 0-1       | 0.6±0.2      | 0.5    | 0-1      | 2.850  |
| Vitamin B2 (mg)                | 0.9±0.3           | 0.8    | 0-2       | 0.9±0.3              | 0.9    | 0-1      | 0.8±0.3            | 0.8   | 1-2       | 0.9±0.3      | 0.8    | 0-2      | 1.458  |
| Vitamin B6 (mg)                | 0.8±0.2           | 0.8    | 0-1       | 0.8±0.2              | 0.7    | 0-1      | 1.4±1.3            | 1.2   | 1-5       | 0.9±0.7      | 0.8    | 0-5      | 0.099  |
| Tot. Folic acid (µg)           | 175.2±59.7        | 166.4  | 82-303    | 152.4±41.9           | 155.6  | 88-209   | 166.5±60.9         | 156.8 | 87-291    | 167.3±55.5   | 160    | 82-303   | 1.947  |
| Vitamin C (mg)                 | 66.1±58.9         | 51.6   | 0-217     | 49.9±42.7            | 38     | 0-156    | 54.3±29.8          | 43.1  | 17-114    | 59.1±48.7    | 43.5   | 0-217    | 2.340  |
| Sodium (mg)                    | 3603.9±595.4      | 3770.2 | 2208-4667 | 3416±1167            | 3594.5 | 902-5035 | 3271±1074          | 3458  | 1586-5369 | 3473.7±879.6 | 3625   | 902-5369 | 1.053  |
| Potassium (mg)                 | 1439.5±564.2      | 1322.5 | 322-2748  | 1356.3±545.5         | 1388   | 591-2335 | 1515±478           | 1442  | 840-2356  | 1437.7±528.9 | 1388   | 322-2748 | 2.580  |
| Calcium (mg)                   | 458.4±206.7       | 438.4  | 36-972    | 452.1±214.8          | 481.6  | 94-744   | 412.8±240.7        | 308.5 | 158-900   | 445.4±212.6  | 387    | 36-972   | 1.665  |
| Magnesium (mg)                 | 177.7±78.1        | 166.5  | 59-387    | 146.7±47.2           | 159.3  | 57-210   | 180.6±49.1         | 165.9 | 124-268   | 170.7±65.1   | 163    | 57-387   | 1.500  |
| Phosphorus (mg)                | 741.6±268.5       | 686    | 300-1204  | 773.9±170.6          | 794.4  | 394-976  | 849.2±237          | 813.3 | 566-1251  | 776.6±238.3  | 767    | 300-1251 | 1.575  |
| Iron (mg)                      | 7.3±2.4           | 6.9    | 2-11      | 7.4±1.3              | 7.9    | 5-9      | 8.3±1.9            | 8.2   | 6-11      | 7.6±2.1      | 7.4    | 2-11     | 1.536  |
| Zinc (mg)                      | 6.7±3.2           | 5.9    | 2-14      | 8.3±2.3              | 8.6    | 4-11     | 8.2±3.4            | 8.5   | 4-15      | 7.5±3.1      | 6.6    | 2-15     | 0.420  |

-p values are calculated with Kruskal Wallis H-Test; p values are calculated independently from the daily energy intake. P values presented here are adjusted after post hoc Bonferroni correction. \* p <0.05.

## English Version of Survey

### **SURVEY FOR DETERMINING RELATIONSHIPS BETWEEN SOCIECONOMIC STATUS, DIETARY HABITS AND RISK OF TYPE II DIABETES IN FEMALE STUDENTS WHO ARE LIVING WITH THEIR FAMILY OR IN THE DORMITORY**

This research will be used for determining relationships between socioeconomic status, dietary habits and the risk of Type II diabetes on female Turkish university students who live with their family or in dormitory. Participating in this survey is on voluntary basis. Thank you for your time and answers.

1)I am living with my family / in dormitory. (please circle the most accurate)

2)Age:

3)Weight :

4)Height :

5)Waist circumference :

6)Do you have a mother, father or brother with diabetes ?    1.YES    /    2. NO

7) Do you have a grandparent with diabetes?    1.YES    /    2.NO

8) Have you ever been diagnosed with high blood pressure ?    1.YES    /    2.NO

9) Do you physically active ? (at least 30 min. in a day)    1. YES    /    2.NO

10) Do you smoke?    1. YES    /    2. NO

11) Are you using alcohol ?    1. YES    /    2. NO

12) Level of income :

1. Less than 900 TL    2. Between 901- 1800 TL    3. More than 1801 TL



## 24 Hour Dietary Recall

Please write below what you consumed yesterday.

|                    | NAME/TYPE OF MEAL | AMOUNT |
|--------------------|-------------------|--------|
| BREAKFAST          |                   |        |
| 1. BREAK/SNACK     |                   |        |
| LUNCH              |                   |        |
| 2. BREAK/SNACK     |                   |        |
| DINNER             |                   |        |
| IN-BETWEEN (OTHER) |                   |        |

## Turkish Version of Survey (Original)

### **AİLESİYLE VEYA YURTTA YAŞAYAN ÜNİVERSİTE ÖĞRENCİLERİNDE BESLENME ALIŞKANLIKLARINA ve SOSYOEKONOMİK DURUMA GÖRE TİP 2 DİYABET RİSKİ HESAPLANMASI ANKETİ**

Bu araştırma ailesiyle veya yurttta yaşayan, üniversite eğitimi gören kız öğrencilerde, beslenme alışkanlıklarına ve sosyoekonomik duruma göre tip 2 diyabet riskinin hesaplanmasına dayanmaktadır. Vereceğiniz cevaplar araştırma sonucunun güvenilirliği için oldukça önem taşımaktadır. Bu ankete katılmak tamamen gönüllülük esaslarına dayanmaktadır. Zamanınızı ayırdığınız için teşekkür ederim...

1)Ailemle yaşıyorum. / Yurtta yaşıyorum. (sizin için uygun olanı yuvarlak içine alınız)

2)Yaş :

3)Kilo:

4)Boy:

5)Bel çevresi :

6)Ailenizde herhangi 1. Derece akrabanızda (anne, baba, kardeş gibi) diyabet var mı ?

1.EVET / 2.HAYIR

7)Ailenizde büyükbaba,büyükanne gibi akrabanızda diyabet var mı ? 1. EVET / 2. HAYIR

8)Bu güne kadar hipertansiyon(yüksek tansiyon) tanısı aldınız?

1. EVET / 2.HAYIR

9)Günde en az 30 dakika fiziksel aktivite yapıyor musunuz? 1. EVET / 2.HAYIR

10)Sigara içiyor musunuz? 1. EVET / 2. HAYIR

11)Alkol kullanıyor musunuz? 1. EVET / 2. HAYIR

12) Gelir düzeyiniz :

1. 900 TL'den az 2. 901 TL-1800 TL arası 3. 1801 TL'den fazla

**BESİN TÜKETİM SIKLIĞI ANKETİ**

| BESİN GRUBU                             | HER GÜN | HAFTADA 1-2 GÜN | HAFTADA 3-4 GÜN | HAFTADA 5-6 GÜN | AYDA 2 GÜN | AYDA 1 GÜN | ASLA TÜKETMEM | MİKTAR |
|-----------------------------------------|---------|-----------------|-----------------|-----------------|------------|------------|---------------|--------|
| <b>SÜT/SÜT ÜRÜNLERİ</b>                 |         |                 |                 |                 |            |            |               |        |
| Süt                                     |         |                 |                 |                 |            |            |               |        |
| Yoğurt,ayran,kefir                      |         |                 |                 |                 |            |            |               |        |
| Peynir çeşitleri                        |         |                 |                 |                 |            |            |               |        |
| <b>ET ÜRÜNLERİ/YUMURTA/KURUBAKLAGİL</b> |         |                 |                 |                 |            |            |               |        |
| Kırmızı et                              |         |                 |                 |                 |            |            |               |        |
| Tavuk,hindi                             |         |                 |                 |                 |            |            |               |        |
| balık                                   |         |                 |                 |                 |            |            |               |        |
| yumurta                                 |         |                 |                 |                 |            |            |               |        |
| Kurubaklagil(nohut,kuru Fasülye vb.)    |         |                 |                 |                 |            |            |               |        |
| Kuruyemiş (badem, fındık, ceviz vb.)    |         |                 |                 |                 |            |            |               |        |
| <b>MEYVE</b>                            |         |                 |                 |                 |            |            |               |        |
| <b>SEBZE</b>                            |         |                 |                 |                 |            |            |               |        |
| <b>EKMEK-TAHILLAR</b>                   |         |                 |                 |                 |            |            |               |        |
| Ekmek                                   |         |                 |                 |                 |            |            |               |        |
| Pilav,bulgur,makarna                    |         |                 |                 |                 |            |            |               |        |
| Hamur işleri(kek, börek, kurabiye vb.)  |         |                 |                 |                 |            |            |               |        |
| <b>ŞEKER/TATLILAR</b>                   |         |                 |                 |                 |            |            |               |        |
| Çikolata                                |         |                 |                 |                 |            |            |               |        |
| Bal-reçel-pekmez                        |         |                 |                 |                 |            |            |               |        |
| kesme şeker                             |         |                 |                 |                 |            |            |               |        |

## 1 GÜNLÜK BESİN TÜKETİM FORMU

Dün neler yiyip içtiğinizi miktarları ile belirtiniz.

|              | ÖĞÜN | MİKTAR |
|--------------|------|--------|
| KAHVALTI     |      |        |
| ARA ÖĞÜN     |      |        |
| ÖĞLE YEMEĞİ  |      |        |
| ARA ÖĞÜN     |      |        |
| AKŞAM YEMEĞİ |      |        |
| ARA ÖĞÜN     |      |        |
